# Supplementary material for: An active and stable multifunctional catalyst with defective UiO-66 as a support for Pd over the continuous catalytic conversion of acetone and hydrogen
Source: Royal Society of Chemistry journal article supplement (doi:10.1039/d0ra09217g), 2020-12-21
Supplement: d0ra09217g1.pdf [file d0ra09217g1.pdf]

## Supporting Information

### An active and stable multifunctional catalyst with defective UiO-66 as support for Pd over the continuous catalytic conversion of acetone and hydrogen

Yingjie Hu<sup>a</sup>, Yuxin Mei<sup>a</sup>, Baining Lin<sup>a,\*</sup>, Xuhong Du<sup>a</sup>, Fan Xu<sup>a</sup>, Huasheng Xie<sup>b</sup>, Kang Wang<sup>b</sup>,  
Yonghua Zhou<sup>a,\*</sup>

<sup>a</sup>College of Chemistry and Chemical Engineering, Central South University, Changsha 410083, China

<sup>b</sup>Cangzhou Dahua Group Company, Ltd, Cangzhou 061000, China

\**baininglin@csu.edu.cn (Lin B)*

*zhouyonghua@csu.edu.cn (Zhou Y)*

**Potentiometric acid-base titrations** were completed with a Metrohm Titrando 905 autotitrator equipped with Dosino 800 20 mL and 10 mL dosing units using a procedure previously reported.<sup>1-4</sup> Prior to each titration, calibrations were performed with 2.00 and 9.00 Metrohm buffer solutions. Sample preparation entailed using approximately 50 mg of sample (previously activated for 12 h at 150 °C under the condition of vacuum) that were crushed into a fine powder with a plastic spatula in a 100 mL beaker. Then approximately 50 mL of 0.01 M NaNO<sub>3</sub> solution was added and allowed to equilibrate for 18 h. Preceding each titration, a stir bar was added to the beaker and the pH was adjusted to a value of 3.00 with 0.1 M HCl. Following, the solution was titrated with a 0.1 M NaOH solution to a pH value of 10.5-11.0 with an injection volume of 0.025 mL at a rate of 0.020 mL min<sup>-1</sup>. In order to better visualize the equivalence points, the first derivative of the titration curve (pH vs. Volume of 0.1 M NaOH added) was taken (dpH/dV vs. Volume of 0.1 M NaOH added). The first derivative plots were then subjected to Lorentzian function curve-fitting with Origin Pro V8.5 multiple peak fitting function.

#### **Calculation of the number of defect sites via potentiometric acid-base titrations**

Explanation of calculations: Owing to the fact that titrations are quantitative in nature and that defect sites inherently have titratable protons (under our conditions with a solution pH of 3), we are able to determine the number of defect sites in each sample. In order to determine the number of Zr-OH<sub>2</sub> and Zr-OH, we simply calculate the amount of NaOH titrant consumed for each species. With respect to the Zr-OH<sub>2</sub> species, we take the difference in the amount of NaOH titrant consumed between the second (Zr-OH<sub>2</sub>) and first (μ<sub>3</sub>-OH) equivalence points (each terminal water is deprotonated once, yielding an additional terminal hydroxyl group which we assume to be equivalent to the terminal hydroxyl group that was already present in the pair). In a similar fashion, the amount of Zr-OH species can be found by taking the difference in NaOH titrant consumed between the third (Zr-OH) and second (Zr-OH<sub>2</sub>) equivalence points and removal yielding an additional terminal hydroxyl group. The relative amounts of defect sites from Zr-OH<sub>2</sub>

and Zr-OH, with respect to each other, are then calculated and assigned the variables  $y$  and  $z$ , respectively. These values are then related to the molecular formula of UiO-66 that incorporates Zr-OH<sub>2</sub> and Zr-OH compensating missing linker defects, Zr<sub>6</sub>O<sub>4</sub>(OH)<sub>4</sub>(bdc)<sub>6-x</sub>[(OH<sub>2</sub>)<sub>y</sub>(OH)<sub>z</sub>]<sub>4</sub>, where  $x$  is the number of missing linkers in an ideal Zr<sub>6</sub>O<sub>4</sub>(OH)<sub>4</sub>(bdc)<sub>6</sub> cluster. Following, the number of missing linkers can be realized by comparing the experimental value of titrated protons from the calculated theoretical values with different numbers of missing linkers.

**Table S1.** Comparison of the catalytic performance of different catalysts.

| Catalyst                        | Temp (°C) | H <sub>2</sub> Pressure (MPa) | Catalyst weight (g) | Volume of acetone (mL) | Reaction time (h) | Acetone conversion (%) | Selectivity to MIBK (%) |
|---------------------------------|-----------|-------------------------------|---------------------|------------------------|-------------------|------------------------|-------------------------|
| Pd/Ui-66(R=15:1)                | 120       | 0.75                          | 0.02                | 5                      | 2                 | 54.44                  | 92.86                   |
| Pd/Mg <sub>3</sub> Al-MMO       | 120       | 2.8                           | 0.35                | 10                     | 5                 | 38.5                   | 82.8                    |
| Pd on the amorphous Zn-Cr (1:1) | 180       | 0.75                          | 2                   | 2.5                    | 2                 | 38-40                  | 70-78                   |
| Pt/ZSM-5@MS                     | 180       | 1.4                           | 0.2                 | 2.5                    | 1                 | 39.7                   | 92.4                    |
| Pd/SO <sub>3</sub> H-Si-HS      | 160       | 1                             | 0.2                 | 2.5                    | 2                 | 43.1                   | 90.7                    |

**Table S2.** Catalytic performance of 0.5wt% Pd/UiO-66(R=15:1) at orthogonal experiments in the trickle bed reactor.

| Reaction conditions |                         |                                                          |                | Acetone conversion (%) | Selectivity (%) |       |      |      |       |        | MIBK+MIBC yield (%) |
|---------------------|-------------------------|----------------------------------------------------------|----------------|------------------------|-----------------|-------|------|------|-------|--------|---------------------|
| temp (°C)           | LHSV (h <sup>-1</sup> ) | C <sub>3</sub> H <sub>6</sub> O/H <sub>2</sub> (mol/mol) | Pressure (MPa) |                        | MIBK            | MIBC  | MO   | DAA  | IPA   | Others |                     |
| 100                 | 0.12                    | 1/1                                                      | 1              | 24.91                  | 82.54           | 3.17  | 0.02 | 5.69 | 6.93  | 1.65   | 21.35               |
| 100                 | 0.15                    | 1/2                                                      | 2              | 23.45                  | 84.02           | 1.61  | 0.03 | 6.83 | 6.28  | 1.23   | 20.08               |
| 100                 | 0.18                    | 1/3                                                      | 3              | 20.72                  | 88.14           | 1.26  | 0.32 | 7.97 | 0.610 | 1.70   | 18.52               |
| 100                 | 0.24                    | 1/4                                                      | 4              | 23.78                  | 83.39           | 1.31  | 0.31 | 7.6  | 6.42  | 0.97   | 20.14               |
| 110                 | 0.12                    | 1/2                                                      | 3              | 35.33                  | 86.99           | 4.25  | 0.14 | 2.45 | 4.59  | 1.58   | 32.25               |
| 110                 | 0.15                    | 1/1                                                      | 4              | 40.04                  | 89.11           | 3.36  | 1.30 | 2.77 | 3.30  | 0.16   | 37.02               |
| 110                 | 0.18                    | 1/4                                                      | 1              | 36.02                  | 88.08           | 3.41  | 1.29 | 2.09 | 4.97  | 0.16   | 32.95               |
| 110                 | 0.24                    | 1/3                                                      | 2              | 34.75                  | 90.42           | 2.83  | 0.28 | 3.15 | 1.90  | 1.42   | 32.40               |
| 120                 | 0.12                    | 1/3                                                      | 4              | 39.62                  | 89.66           | 3.94  | 1.49 | 1.56 | 0.87  | 2.48   | 37.08               |
| 120                 | 0.15                    | 1/4                                                      | 3              | 42.28                  | 92.23           | 3.91  | 0.14 | 1.04 | 1.29  | 1.39   | 40.65               |
| 120                 | 0.18                    | 1/3                                                      | 2              | 51.37                  | 89.95           | 6.30  | 0.15 | 1.32 | 0.64  | 1.64   | 49.44               |
| 120                 | 0.24                    | 1/2                                                      | 1              | 44.99                  | 90.13           | 5.05  | 0.17 | 1.12 | 1.53  | 2.00   | 42.82               |
| 130                 | 0.12                    | 1/4                                                      | 2              | 60.29                  | 86.13           | 8.36  | 0.08 | 0.49 | 1.58  | 3.36   | 56.97               |
| 130                 | 0.15                    | 1/3                                                      | 1              | 58.51                  | 83.10           | 10.68 | 0.06 | 0.28 | 0.8   | 5.08   | 54.87               |
| 130                 | 0.18                    | 1/2                                                      | 4              | 60.79                  | 84.95           | 8.64  | 0.06 | 0.62 | 0.63  | 5.10   | 56.89               |
| 130                 | 0.24                    | 1/1                                                      | 3              | 57.19                  | 83.84           | 5.86  | 3.41 | 0.85 | 2.73  | 3.31   | 51.30               |

The volume of catalytic is 6 mL and time on stream is 2 h. IPA is isopropanol. Others is mainly C<sub>9</sub><sup>+</sup>.

**Table S3.** Calculation results of orthogonal test.

| Experiment      | Temp(°C) | LHSV(h <sup>-1</sup> ) | C <sub>3</sub> H <sub>6</sub> O/H <sub>2</sub> (mol/mol) | Pressure (MPa) | MIBK+MIBC yield (%) |
|-----------------|----------|------------------------|----------------------------------------------------------|----------------|---------------------|
| 1               | 1        | 1                      | 1                                                        | 1              | 82.5                |
| 2               | 1        | 2                      | 2                                                        | 2              | 85.6                |
| 3               | 1        | 3                      | 3                                                        | 3              | 88.1                |
| 4               | 1        | 4                      | 4                                                        | 4              | 84.4                |
| 5               | 2        | 1                      | 2                                                        | 3              | 87                  |
| 6               | 2        | 2                      | 1                                                        | 4              | 89.1                |
| 7               | 2        | 3                      | 4                                                        | 1              | 88.1                |
| 8               | 2        | 4                      | 3                                                        | 2              | 90.4                |
| 9               | 3        | 1                      | 3                                                        | 4              | 89.7                |
| 10              | 3        | 2                      | 4                                                        | 3              | 92.2                |
| 11              | 3        | 3                      | 1                                                        | 2              | 89.95               |
| 12              | 3        | 4                      | 2                                                        | 1              | 90.13               |
| 13              | 4        | 1                      | 4                                                        | 2              | 86.13               |
| 14              | 4        | 2                      | 3                                                        | 1              | 83.1                |
| 15              | 4        | 3                      | 2                                                        | 4              | 85                  |
| 16              | 4        | 4                      | 1                                                        | 3              | 83.8                |
| K11             | 340.6    | 345.33                 | 345.35                                                   | 343.83         |                     |
| K21             | 354.6    | 350                    | 347.73                                                   | 352.08         |                     |
| K31             | 361.98   | 351.15                 | 351.3                                                    | 351.1          |                     |
| K41             | 338.03   | 348.73                 | 350.83                                                   | 348.2          |                     |
| K1L             | 85.15    | 86.3325                | 86.3375                                                  | 85.9575        |                     |
| K2L             | 88.65    | 87.5                   | 86.9325                                                  | 88.02          |                     |
| K3L             | 90.495   | 87.7875                | 87.825                                                   | 87.775         |                     |
| K4L             | 84.5075  | 87.1825                | 87.7075                                                  | 87.05          |                     |
| R               | 5.9875   | 1.455                  | 1.4875                                                   | 2.0625         |                     |
| Excellent level | 120      | 0.18                   | 1/2                                                      | 2              |                     |

**Table S4.** Porosity property of various samples

| samples        | BET surface area (m <sup>2</sup> /g) | V <sub>t</sub> (cm <sup>3</sup> /g) | V <sub>meso</sub> (cm <sup>3</sup> /g) |
|----------------|--------------------------------------|-------------------------------------|----------------------------------------|
| UiO-66         | 1677                                 | 0.88                                | 0.08                                   |
| UiO-66(R=15:1) | 1068                                 | 1.03                                | 0.66                                   |

V<sub>t</sub> stands for the total pore volume determined by using the adsorption branch of the N<sub>2</sub> isotherm at P/P<sub>0</sub>=0.95. V<sub>meso</sub> stands for the mesopore volume obtained from the BJH adsorption cumulative volume.

**Table S5.** Calculation results of missing linker in UiO-66.

| Zr-OH <sub>2</sub>                                        |                                                                                                                                                                                               |                                                       |                                      |
|-----------------------------------------------------------|-----------------------------------------------------------------------------------------------------------------------------------------------------------------------------------------------|-------------------------------------------------------|--------------------------------------|
| EP2-EP1=                                                  | 0.97                                                                                                                                                                                          | mL NaOH                                               |                                      |
|                                                           | 0.097                                                                                                                                                                                         | mmol defect sites from Zr-OH <sub>2</sub>             |                                      |
| Zr-OH                                                     |                                                                                                                                                                                               |                                                       |                                      |
| EP3-EP2=                                                  | 1.88                                                                                                                                                                                          | mL NaOH                                               |                                      |
|                                                           | 0.188                                                                                                                                                                                         | mmol defect sites from Zr-OH                          |                                      |
|                                                           | 0.285                                                                                                                                                                                         | Total mmol defect sites from [(OH <sub>2</sub> )(OH)] |                                      |
| Relative amount of defect sites from Zr-OH <sub>2</sub> = |                                                                                                                                                                                               |                                                       | 34.1%                                |
| Relative amount of defect sites from Zr-OH =              |                                                                                                                                                                                               |                                                       | 65.9%                                |
| Missing Linker                                            | Molecular Formula                                                                                                                                                                             | MW                                                    | mmol defect sites in 0.0498 g sample |
| 0                                                         | Zr <sub>6</sub> O <sub>4</sub> (OH) <sub>4</sub> (C <sub>8</sub> H <sub>4</sub> O <sub>4</sub> ) <sub>6</sub>                                                                                 | 1664.06                                               | 0                                    |
| 1                                                         | Zr <sub>6</sub> O <sub>4</sub> (OH) <sub>4</sub> (C <sub>8</sub> H <sub>4</sub> O <sub>4</sub> ) <sub>5</sub> [(H <sub>2</sub> O) <sub>0.341</sub> (OH) <sub>0.659</sub> ] <sub>4</sub>       | 1569.35                                               | 0.127                                |
| 1.5                                                       | Zr <sub>6</sub> O <sub>4</sub> (OH) <sub>4</sub> (C <sub>8</sub> H <sub>4</sub> O <sub>4</sub> ) <sub>4.5</sub> [(H <sub>2</sub> O) <sub>0.341</sub> (OH) <sub>0.659</sub> ] <sub>6</sub>     | 1521.99                                               | 1.96                                 |
| 2                                                         | Zr <sub>6</sub> O <sub>4</sub> (OH) <sub>4</sub> (C <sub>8</sub> H <sub>4</sub> O <sub>4</sub> ) <sub>4</sub> [(H <sub>2</sub> O) <sub>0.341</sub> (OH) <sub>0.659</sub> ] <sub>8</sub>       | 1474.64                                               | 0.270                                |
| 1.6                                                       | Zr <sub>6</sub> O <sub>4</sub> (OH) <sub>4</sub> (C <sub>8</sub> H <sub>4</sub> O <sub>4</sub> ) <sub>4.4</sub> [(H <sub>2</sub> O) <sub>0.341</sub> (OH) <sub>0.659</sub> ] <sub>6.4</sub>   | 1512.52                                               | 0.211                                |
| <b>1.58</b>                                               | Zr <sub>6</sub> O <sub>4</sub> (OH) <sub>4</sub> (C <sub>8</sub> H <sub>4</sub> O <sub>4</sub> ) <sub>4.42</sub> [(H <sub>2</sub> O) <sub>0.341</sub> (OH) <sub>0.659</sub> ] <sub>6.32</sub> | 1514.42                                               | <b>0.208</b>                         |
| 1.59                                                      | Zr <sub>6</sub> O <sub>4</sub> (OH) <sub>4</sub> (C <sub>8</sub> H <sub>4</sub> O <sub>4</sub> ) <sub>4.41</sub> [(H <sub>2</sub> O) <sub>0.341</sub> (OH) <sub>0.659</sub> ] <sub>6.36</sub> | 1513.47                                               | 0.209                                |

**Table S6.** Calculation results of missing linker in UiO-66(R=15:1).

| Zr-OH <sub>2</sub>                                        |                                                                                                                                                                                               |                                                       |                                      |
|-----------------------------------------------------------|-----------------------------------------------------------------------------------------------------------------------------------------------------------------------------------------------|-------------------------------------------------------|--------------------------------------|
| EP2-EP1=                                                  | 0.58                                                                                                                                                                                          | mL NaOH                                               |                                      |
|                                                           | 0.058                                                                                                                                                                                         | mmol defect sites from Zr-OH <sub>2</sub>             |                                      |
| Zr-OH                                                     |                                                                                                                                                                                               |                                                       |                                      |
| EP3-EP2=                                                  | 2.91                                                                                                                                                                                          | mL NaOH                                               |                                      |
|                                                           | 0.291                                                                                                                                                                                         | mmol defect sites from Zr-OH                          |                                      |
|                                                           | 0.349                                                                                                                                                                                         | Total mmol defect sites from [(OH <sub>2</sub> )(OH)] |                                      |
| Relative amount of defect sites from Zr-OH <sub>2</sub> = |                                                                                                                                                                                               |                                                       | 16.6%                                |
| Relative amount of defect sites from Zr-OH =              |                                                                                                                                                                                               |                                                       | 83.4%                                |
| Missing Linker                                            | Molecular Formula                                                                                                                                                                             | MW                                                    | mmol defect sites in 0.0498 g sample |
| 0                                                         | Zr <sub>6</sub> O <sub>4</sub> (OH) <sub>4</sub> (C <sub>8</sub> H <sub>4</sub> O <sub>4</sub> ) <sub>6</sub>                                                                                 | 1664.06                                               | 0                                    |
| 1                                                         | Zr <sub>6</sub> O <sub>4</sub> (OH) <sub>4</sub> (C <sub>8</sub> H <sub>4</sub> O <sub>4</sub> ) <sub>5</sub> [(H <sub>2</sub> O) <sub>0.166</sub> (OH) <sub>0.834</sub> ] <sub>4</sub>       | 1568.64                                               | 0.127                                |
| 1.5                                                       | Zr <sub>6</sub> O <sub>4</sub> (OH) <sub>4</sub> (C <sub>8</sub> H <sub>4</sub> O <sub>4</sub> ) <sub>4.5</sub> [(H <sub>2</sub> O) <sub>0.166</sub> (OH) <sub>0.834</sub> ] <sub>6</sub>     | 1520.93                                               | 0.197                                |
| 2                                                         | Zr <sub>6</sub> O <sub>4</sub> (OH) <sub>4</sub> (C <sub>8</sub> H <sub>4</sub> O <sub>4</sub> ) <sub>4</sub> [(H <sub>2</sub> O) <sub>0.166</sub> (OH) <sub>0.834</sub> ] <sub>8</sub>       | 1473.22                                               | 0.271                                |
| 1.8                                                       | Zr <sub>6</sub> O <sub>4</sub> (OH) <sub>4</sub> (C <sub>8</sub> H <sub>4</sub> O <sub>4</sub> ) <sub>4.2</sub> [(H <sub>2</sub> O) <sub>0.166</sub> (OH) <sub>0.834</sub> ] <sub>7.2</sub>   | 1492.30                                               | 0.241                                |
| 1.9                                                       | Zr <sub>6</sub> O <sub>4</sub> (OH) <sub>4</sub> (C <sub>8</sub> H <sub>4</sub> O <sub>4</sub> ) <sub>4.1</sub> [(H <sub>2</sub> O) <sub>0.166</sub> (OH) <sub>0.834</sub> ] <sub>7.6</sub>   | 1482.76                                               | 0.256                                |
| 1.88                                                      | Zr <sub>6</sub> O <sub>4</sub> (OH) <sub>4</sub> (C <sub>8</sub> H <sub>4</sub> O <sub>4</sub> ) <sub>4.12</sub> [(H <sub>2</sub> O) <sub>0.166</sub> (OH) <sub>0.834</sub> ] <sub>7.52</sub> | 1484.67                                               | 0.253                                |
| <b>1.89</b>                                               | Zr <sub>6</sub> O <sub>4</sub> (OH) <sub>4</sub> (C <sub>8</sub> H <sub>4</sub> O <sub>4</sub> ) <sub>4.11</sub> [(H <sub>2</sub> O) <sub>0.166</sub> (OH) <sub>0.834</sub> ] <sub>7.56</sub> | 1483.72                                               | <b>0.254</b>                         |

**Table S7.** Results of the mass percent (P), Pd dispersion (D), and Pd particle average size (d) of

three catalysts.

| Catalyst                          | P (wt %) | D (%) | d (nm) |
|-----------------------------------|----------|-------|--------|
| Pd/UiO-66 before reaction         | 0.481    | 36.8  | 3.05   |
| Pd/UiO-66(R=15:1) before reaction | 0.486    | 47.3  | 2.20   |
| Pd/UiO-66(R=15:1) after reaction  | 0.442    | 39.8  | 2.73   |

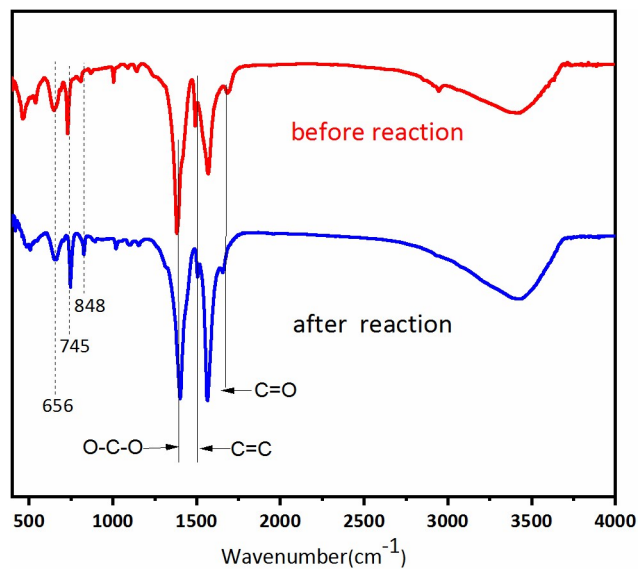

**Figure S1.** FT-IR spectra of Pd/UiO-66(R=15:1) before and after 1000h reaction.

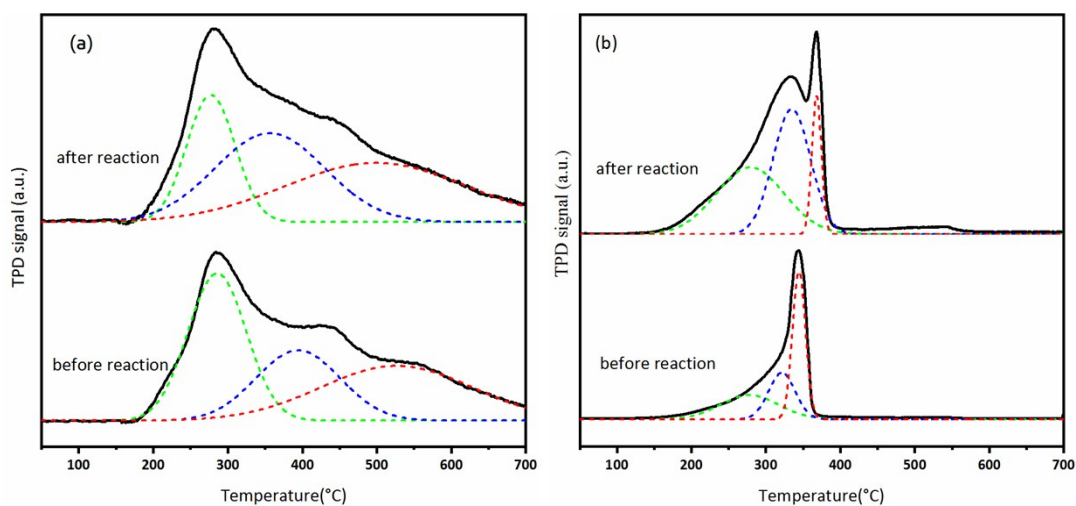

**Figure S2.**  $\text{NH}_3$ -TPD (a) and  $\text{CO}_2$ -TPD (b) profiles of Pd/UiO-66(R=15:1) before and after 1000h reaction.

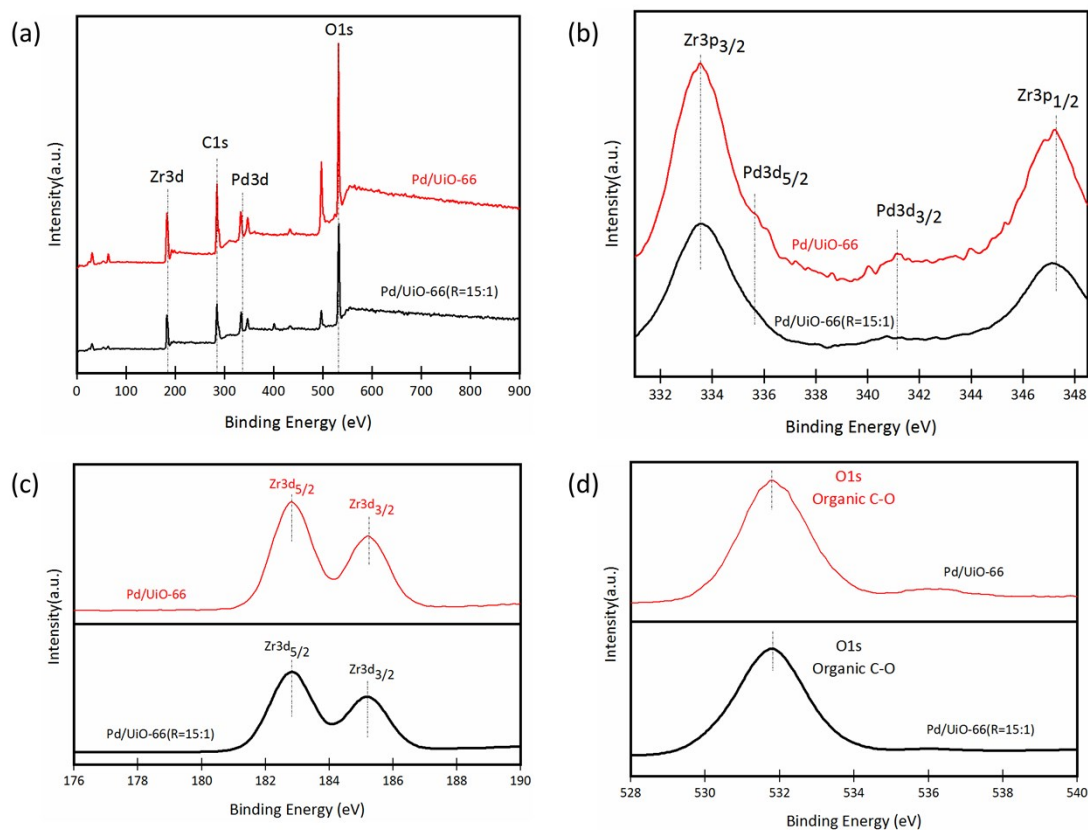

**Figure S3.** The XPS elemental surveys of Pd/Uio-66 and Pd/Uio-66(R=15:1) (a), the XPS spectra of Pd/Uio-66 and Pd/Uio-66(R=15:1) in the Zr 3p and Pd 3d regions (b), the XPS spectra of Pd/Uio-66 and Pd/Uio-66(R=15:1) in the Zr 3d region (c) and the XPS spectra of Pd/Uio-66 and Pd/Uio-66(R=15:1) in O 1s region (d).

## References

- (1) R. C. Klet, Y. Liu, T. C. Wang, J. T. Hupp and O. K. Farha, *J. Mater. Chem. A.*, 2016, **4**, 1479-1485.
- (2) M. R. Destefan, T. Islamoglu, S. J. Garibay, J. T. Hupp and O. K. Farh, *Chem. Mater.*, 2017, **29**, 1357-1361.
- (3) G. Ye, D. Zhang, X. Li, K. Leng, W. Zhang, J. Ma, Y. Sun, W. Xu and S. Ma, *ACS. Appl. Mater. Inter.*, 2017, **9**, 34937-34943.
- (4) D. Jiang, G. Fang, Y. Tong, X. Wu, Y. Wang, D. Hong, W. Leng, Z. Liang, P. Tu, L. Liu, K. Xu, J. Ni and X. Li, *ACS. Catal.*, 2018, **8**, 11973-11978.
